A breakthrough over 3 decades in the making

# A NEW CLASS FOR THE TREATMENT OF SCHIZOPHRENIA IS HERE

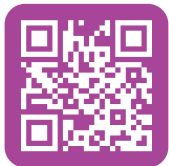

For more information,  
go to [treatscz.com](https://treatscz.com)
