# The American Journal of Psychiatry

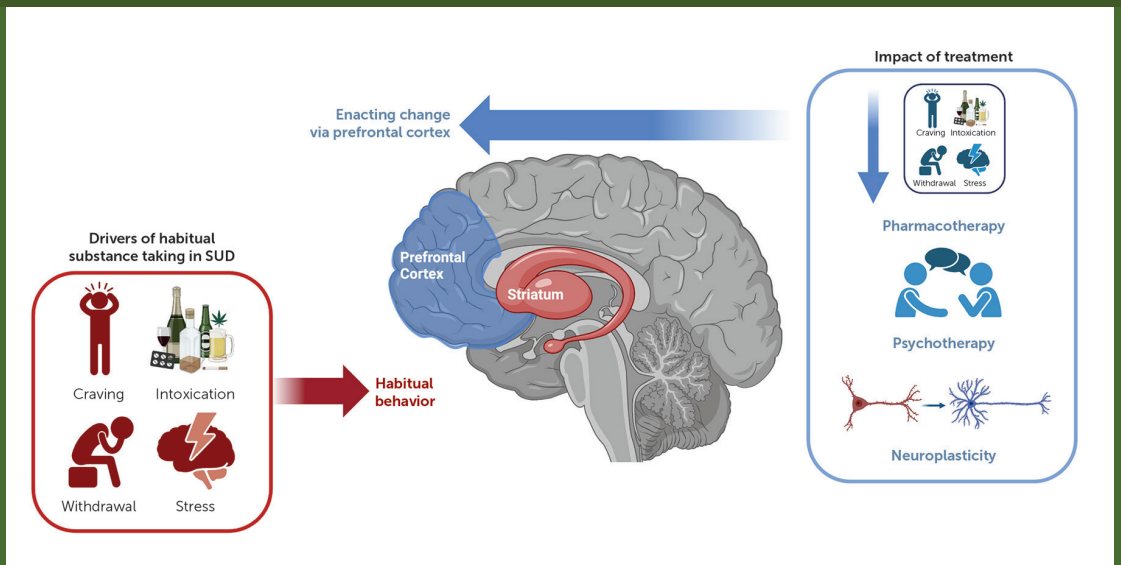

The Neurocircuitry of Substance Use Disorder, Treatment,  
and Change: A Resource for Clinical Psychiatrists

Disparities in Treatment for Alcohol Use Disorder  
Among All of Us Participants

Association of Neuromelanin-Sensitive MRI Signal  
With Lifetime Substance Use in Young Women

Genetic Heterogeneity Across Dimensions  
of Alcohol Use Behaviors
